# Supplementary material
Source: Springer Nature journal article supplement (https://cris.unibo.it/retrieve/2ed9fa77-be86-45b7-b7e8-d61cbc28b22e/13428_2026_3049_MOESM1_ESM.pdf)
Supplement: MOESM1 [file 13428_2026_3049_MOESM1_ESM.pdf]

1           Supplementary material for the paper entitled  
2           “Multi-method validation of the new computerized  
3           test of fluid intelligence MatriKS”  
4

5           Table 1 shows the distribution of participants across different school levels.

Table 1: Participants' distribution by school level

| <b>School level</b> | <b>n</b> | <b>%</b> |
|---------------------|----------|----------|
| Kindergarden        |          |          |
| Second year         | 29       | 12       |
| Third year          | 31       | 13       |
| Primary School      |          |          |
| First year          | 40       | 17       |
| Second year         | 12       | 5        |
| Third year          | 41       | 17       |
| Fourth year         | 59       | 25       |
| Fifth year          | 25       | 11       |
